# Supplementary material for: Comparative Study of Four Coloured Nanoparticle Labels in Lateral Flow Immunoassay
Source: MDPI journal article supplement (doi:10.3390/nano11123277), 2021-12-02
Supplement: s1 [file s1]

## Supplementary Materials

### Comparative study of four coloured nanoparticle labels in lateral flow immunoassay

Shyatesa C. Razo <sup>1,2</sup>, Anastasiya I. Elovenkova <sup>1</sup>, Irina V. Safenkova <sup>1</sup>, Natalia V. Drenova <sup>3</sup>, Yuri A. Varitsev <sup>4</sup>, Anatoly V. Zherdev <sup>1</sup> and Boris B. Dzantiev <sup>1,\*</sup>

<sup>1</sup>A.N. Bach Institute of Biochemistry, Research Centre of Biotechnology of the Russian Academy of Sciences, Leninsky Prospect 33, 119071 Moscow, Russia

<sup>2</sup>Agrarian and Technological Institute, RUDN University, Mikluho-Maklaya Street 8/2, 117198 Moscow, Russia

<sup>3</sup>All-Russian Plant Quarantine Centre, Pogranichnaya Street 32, Bykovo, Ramenskoe, Moscow Region, 140150, Russia

<sup>4</sup>Russian Potato Research Center, Kraskovo, Moscow Region, 140051, Russia

\*Correspondence: dzantiev@inbi.ras.ru; Tel.: +74959543142

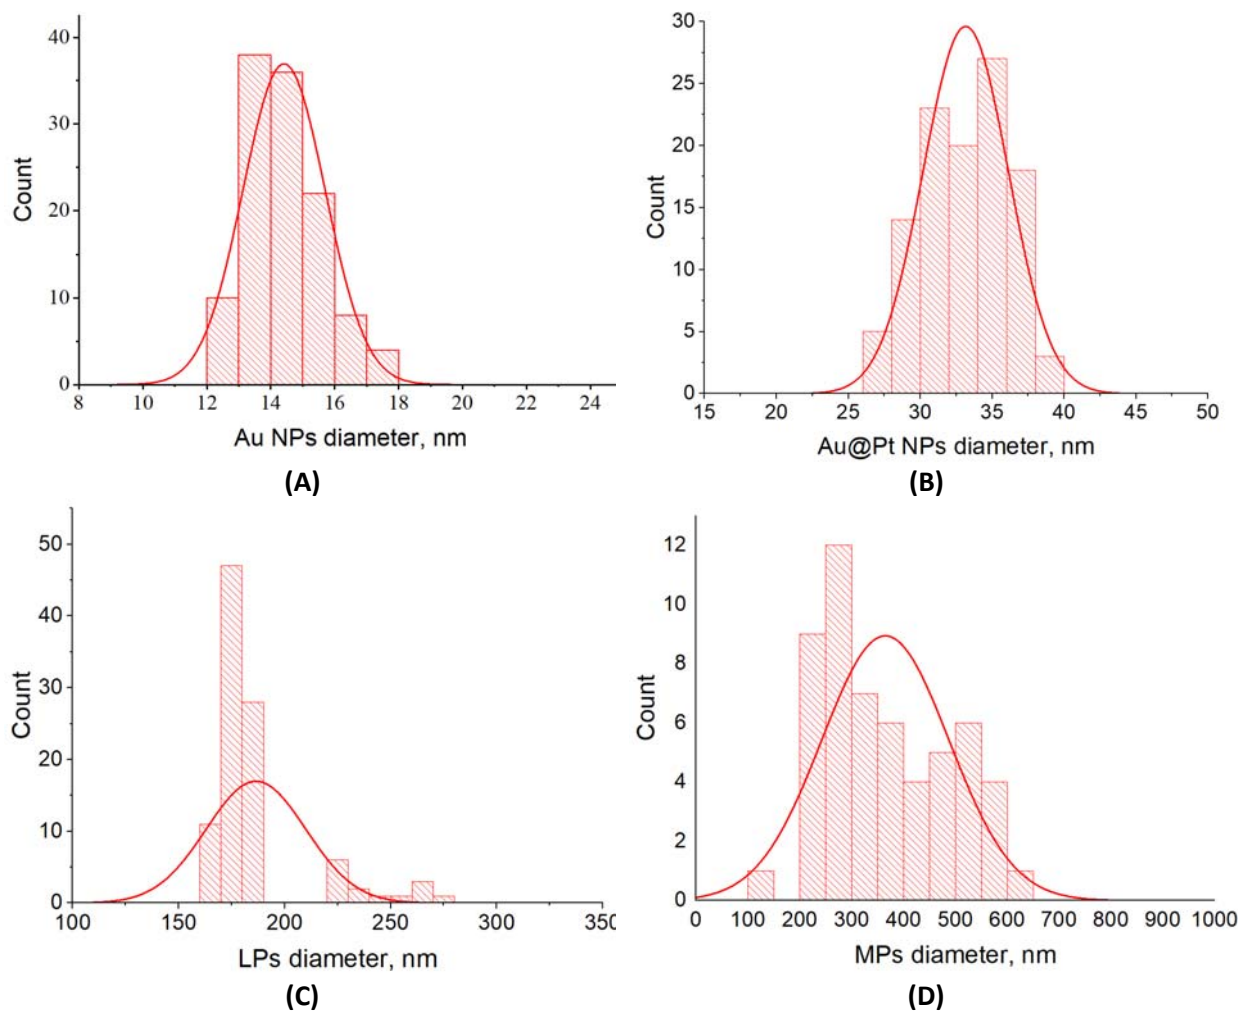

**Figure S1.** Size distributions of nanoparticles by TEM. (A) Au NPs, total number of counts ( $n$ ) = 119; (B) Au@Pt NPs,  $n$  = 110; (C) LPs,  $n$  = 100; (D) MPs,  $n$  = 55.
